# Supplementary material
Source: HighWire-hosted journal article supplement (https://www.annfammed.org/highwire/filestream/8769/field_highwire_adjunct_files/0/PenmAFM-152-16_Supp_App.pdf)
Supplement: PenmAFM-152-16_Supp_App.pdf [file PenmAFM-152-16_Supp_App.pdf]

Supplemental materials for:

Penm J, MacKinnon N, Strakowski S, Ying J, Doty M. Minding the gap: perceived factors associated with primary care coordination of adults in 11 countries. *Ann Fam Med*. 2017;15(2):113-119.

## Appendices

Appendix 1. Odds ratio of *poor primary care coordination* with patient outcomes.\*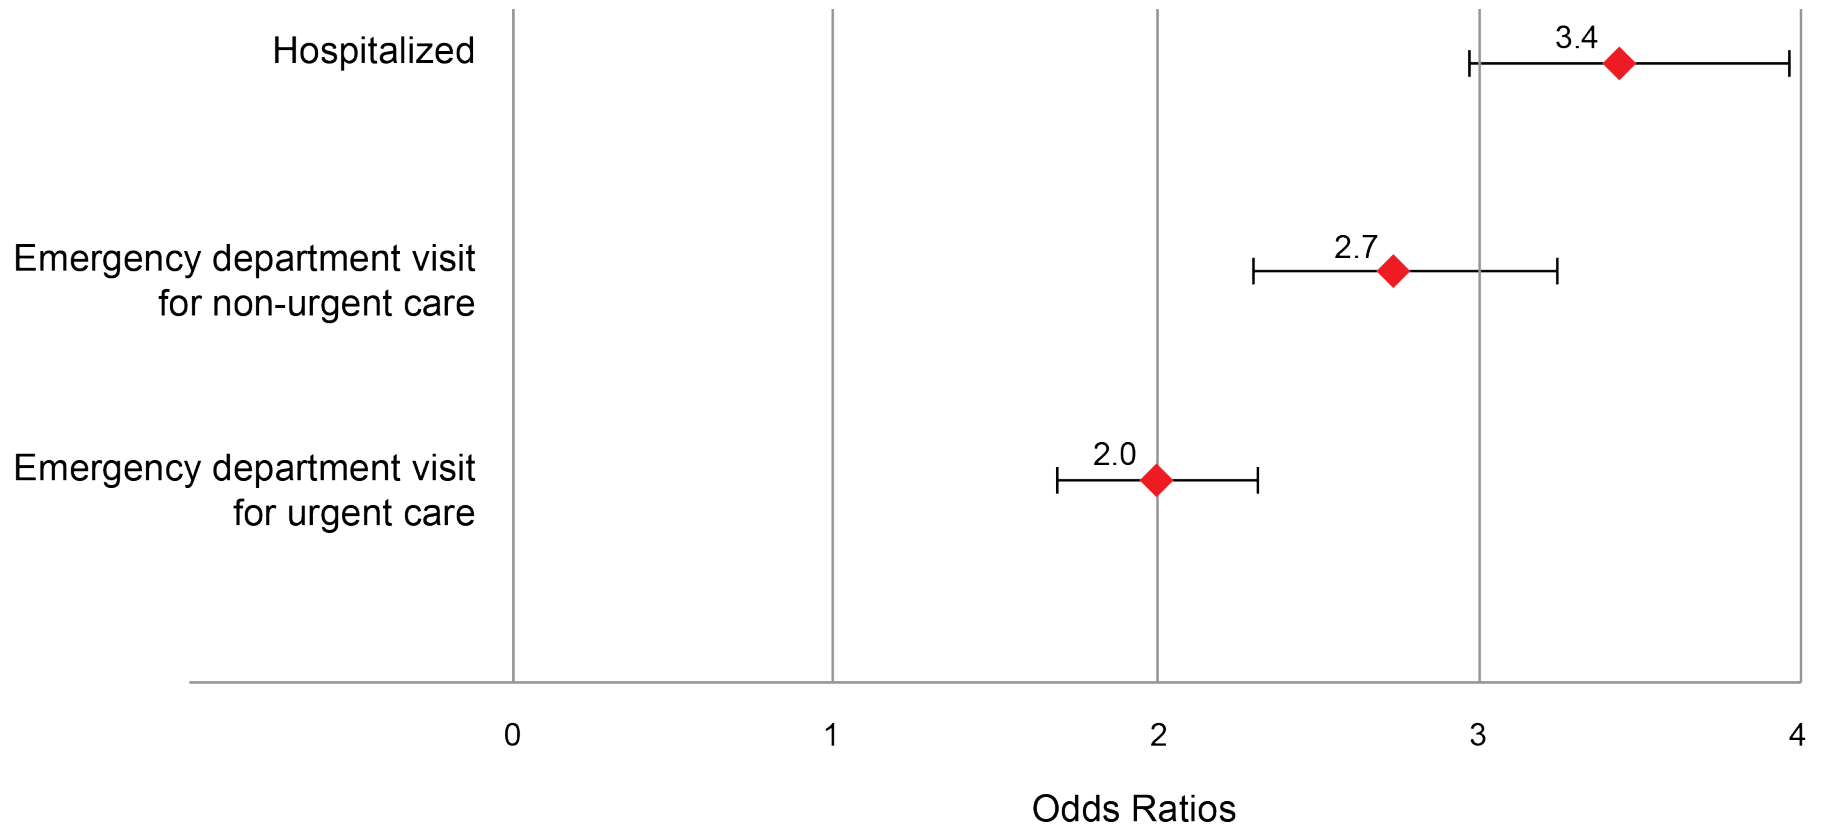

\**Poor primary care coordination* was defined as having at least three gaps from five questions.

**Appendix 2. Distribution of respondents by country, social-economic demographics, and health related characteristics\***

| Characteristics |  | Total number of responses (%) | Number of respondents with <i>poor primary care coordination (%)</i> <sup>†</sup> | Number of US respondents with <i>poor primary care coordination (%)</i> <sup>†</sup> |
|-----------------|--|-------------------------------|-----------------------------------------------------------------------------------|--------------------------------------------------------------------------------------|
|                 |  | <b>N=13,958</b>               | <b>N=724</b>                                                                      | <b>N=137</b>                                                                         |
| Country         |  |                               |                                                                                   |                                                                                      |
| Australia       |  | 1623 (11.6)                   | 68 (9.4)                                                                          | NA                                                                                   |
| Canada          |  | 3787 (27.1)                   | 174 (24.0)                                                                        | NA                                                                                   |
| France          |  | 984 (7.0)                     | 61 (8.4)                                                                          | NA                                                                                   |
| Germany         |  | 777 (5.6)                     | 60 (8.3)                                                                          | NA                                                                                   |
| Netherlands     |  | 774 (5.5)                     | 18 (2.5)                                                                          | NA                                                                                   |
| New Zealand     |  | 715 (5.1)                     | 27 (3.7)                                                                          | NA                                                                                   |

|                |             |            |             |
|----------------|-------------|------------|-------------|
| Norway         | 683 (4.9)   | 33 (4.6)   | NA          |
| Sweden         | 1215 (8.7)  | 57 (7.9)   | NA          |
| Switzerland    | 1229 (8.8)  | 71 (9.8)   | NA          |
| United Kingdom | 776 (5.6)   | 18 (2.5)   | NA          |
| US             | 1395 (10.0) | 137 (18.9) | 137 (100.0) |
| <b>Age</b>     |             |            |             |
| 18-24          | 1123 (8.0)  | 48 (6.6)   | 7 (5.1)     |
| 25-34          | 1735 (12.4) | 84 (11.6)  | 19 (13.9)   |
| 35-49          | 3339 (23.9) | 202 (27.9) | 33 (24.1)   |
| 50-64          | 4107 (29.4) | 231 (31.9) | 45 (32.8)   |
| 65+            | 3654 (26.2) | 159 (22.0) | 33 (24.1)   |
| <b>Gender</b>  |             |            |             |

|                                                |             |            |           |
|------------------------------------------------|-------------|------------|-----------|
| Male                                           | 6242 (44.7) | 276 (38.1) | 40 (29.2) |
| Female                                         | 7716 (55.3) | 448 (61.9) | 97 (70.8) |
| <b>Household income</b>                        |             |            |           |
| Above average                                  | 3944 (28.3) | 154 (21.3) | 22 (16.1) |
| Average                                        | 3195 (22.9) | 132 (18.2) | 21 (15.3) |
| Below average                                  | 5328 (38.2) | 373 (51.5) | 84 (61.3) |
| Missing                                        | 1491 (10.7) | 65 (9.0)   | 10 (7.3)  |
| <b>Number of doctors seen in the last year</b> |             |            |           |
| No doctor                                      | 1994 (14.3) | 30 (4.1)   | 4 (2.9)   |
| 1 doctor                                       | 4109 (29.4) | 77 (10.6)  | 12 (8.8)  |
| 2 to 3 doctors                                 | 5872 (42.1) | 347 (47.9) | 59 (43.1) |
| 4 or more doctors                              | 1677 (12.0) | 249 (34.4) | 59 (43.1) |

|                                     |              |            |           |
|-------------------------------------|--------------|------------|-----------|
| Missing                             | 306 (2.2)    | 21 (2.9)   | 3 (2.2)   |
| <b>Health status</b>                |              |            |           |
| Fair or poor                        | 2184 (15.6)  | 272 (37.6) | 60 (43.8) |
| Good, very good or excellent        | 11743 (84.1) | 452 (62.4) | 77 (56.2) |
| Missing                             | 31 (0.2)     | 0 (0.0)    | 0 (0.0)   |
| <b>Number of medications</b>        |              |            |           |
| No medicine                         | 5638 (40.4)  | 189 (26.1) | 21 (15.3) |
| 1 to 4 medicines                    | 5984 (42.9)  | 320 (44.2) | 54 (39.4) |
| 5 or more medicines                 | 1939 (13.9)  | 194 (26.8) | 59 (43.1) |
| Missing                             | 397 (2.8)    | 21 (2.9)   | 3 (2.2)   |
| <b>Number of chronic conditions</b> |              |            |           |
| No chronic conditions               | 5479 (39.3)  | 144 (19.9) | 10 (7.3)  |

|                                                                 |              |            |           |
|-----------------------------------------------------------------|--------------|------------|-----------|
| 1 chronic condition                                             | 3383 (24.2)  | 158 (21.8) | 25 (18.2) |
| 2 to 4 chronic conditions                                       | 4220 (30.2)  | 319 (44.1) | 66 (48.2) |
| 5 or more chronic conditions                                    | 474 (3.4)    | 73 (10.1)  | 30 (21.9) |
| Missing                                                         | 402 (2.9)    | 30 (4.1)   | 6 (4.4)   |
| <b><i>Regular doctor experiences</i></b>                        |              |            |           |
| Regular doctor often or always knows your medical history       | 11332 (81.2) | 488 (67.4) | 93 (67.9) |
| Regular doctor often or always spends enough time with you      | 11338 (81.2) | 473 (65.3) | 83 (60.6) |
| Regular doctor often or always involves you as much as you want | 11355 (81.4) | 494 (68.2) | 91 (66.4) |
| Regular doctor often or always explains things well             | 12165 (87.2) | 511 (70.6) | 86 (62.8) |

| <b>US respondents only – Insurance</b>      |                                         | <b>N=1,395</b>  | <b>N=137</b> |           |
|---------------------------------------------|-----------------------------------------|-----------------|--------------|-----------|
|                                             | No insurance                            | 141 (10.1)      | 14 (10.2)    | 14 (10.2) |
|                                             | Private                                 | 634 (45.4)      | 57 (41.6)    | 57 (41.6) |
|                                             | Medicare                                | 433 (31.0)      | 32 (23.4)    | 32 (23.4) |
|                                             | Medicaid                                | 180 (12.9)      | 34 (24.8)    | 34 (24.8) |
|                                             | Missing                                 | 7 (0.5)         | 0 (0.0)      | 0 (0.0)   |
| <b>Non- US respondents only – Insurance</b> |                                         | <b>N=12,563</b> | <b>N=587</b> |           |
|                                             | Public insurance only                   | 6144 (48.9)     | 295 (50.3)   | NA        |
|                                             | Public insurance + additional insurance | 6218 (49.5)     | 283 (48.2)   | NA        |
|                                             | Missing                                 | 201 (1.6)       | 9 (1.5)      | NA        |

\*NA = Not applicable, US=United States

†*Poor primary care coordination* was defined as having at least three gaps from five questions.



**Appendix 3. Odds ratio of *poor primary care coordination* and individual care coordination gaps\***

| Characteristics<br>(n=13,958) |             | <i>Poor primary care coordination</i> <sup>†</sup> | Test/records not available at scheduled appointment | Conflicting information received for medical care | Unnecessary test ordered as it had already been done | Specialist not informed by PCP | PCP not informed by specialist |
|-------------------------------|-------------|----------------------------------------------------|-----------------------------------------------------|---------------------------------------------------|------------------------------------------------------|--------------------------------|--------------------------------|
|                               |             | OR (95% CI)                                        |                                                     |                                                   |                                                      |                                |                                |
| Country                       |             |                                                    |                                                     |                                                   |                                                      |                                |                                |
|                               | Australia   | 0.5 (0.4 – 0.7)‡                                   | 0.5 (0.4 – 0.6)‡                                    | 0.9 (0.7 – 1.1)                                   | 0.6 (0.5 – 0.7)‡                                     | 0.6 (0.5 – 0.8)‡               | 0.6 (0.5 – 0.8)‡               |
|                               | Canada      | 0.5 (0.4 – 0.6)‡                                   | 0.6 (0.5 – 0.8)‡                                    | 0.7 (0.6 – 0.9)‡                                  | 0.4 (0.3 – 0.5)‡                                     | 0.8 (0.6 – 1.0)                | 0.9 (0.7 – 1.1)                |
|                               | France      | 0.6 (0.4 – 0.8)‡                                   | 0.6 (0.4 – 0.7)‡                                    | 0.7 (0.5 – 0.8)‡                                  | 0.8 (0.6 – 1.0)                                      | 0.9 (0.7 – 1.2)                | 1.2 (1.0 – 1.5)                |
|                               | Germany     | 0.5 (0.4 – 0.8)‡                                   | 0.4 (0.3 – 0.5)‡                                    | 0.9 (0.7 – 1.2)                                   | 1.0 (0.8 – 1.3)                                      | 1.0 (0.8 – 1.4)                | 2.6 (2.0 – 3.3)‡               |
|                               | Netherlands | 0.3 (0.2 – 0.5)‡                                   | 0.8 (0.6 – 1.1)                                     | 1.6 (1.2 – 2.0)‡                                  | 1.3 (1.0 – 1.7)                                      | 0.4 (0.2 – 0.5)‡               | 0.3 (0.2 – 0.4)‡               |
|                               | New Zealand | 0.5 (0.3 – 0.8)‡                                   | 0.5 (0.4 – 0.7)‡                                    | 1.0 (0.8 – 1.3)                                   | 0.5 (0.3 – 0.6)‡                                     | 0.6 (0.4 – 0.8)‡               | 0.7 (0.5 – 1.0)                |

|               |                |                  |                  |                  |                  |                 |                  |
|---------------|----------------|------------------|------------------|------------------|------------------|-----------------|------------------|
|               | Norway         | 0.5 (0.3 – 0.7)‡ | 0.3 (0.3 – 0.5)‡ | 0.9 (0.7 – 1.2)  | 0.5 (0.4 – 0.7)‡ | 0.7 (0.5 – 1.0) | 1.3 (1.0 – 1.6)  |
|               | Sweden         | 0.5 (0.3 – 0.6)‡ | 0.6 (0.5 – 0.7)‡ | 0.8 (0.6 – 1.0)  | 0.2 (0.2 – 0.3)‡ | 0.8 (0.7 – 1.1) | 1.3 (1.0 – 1.6)  |
|               | Switzerland    | 0.8 (0.6 – 1.1)  | 0.6 (0.5 – 0.8)‡ | 0.8 (0.6 – 1.0)  | 1.7 (1.3 – 2.1)‡ | 1.3 (1.0 – 1.7) | 0.9 (0.7 – 1.1)  |
|               | United Kingdom | 0.3 (0.2 – 0.5)‡ | 0.5 (0.4 – 0.7)‡ | 0.4 (0.3 – 0.5)‡ | 0.5 (0.3 – 0.7)‡ | 0.6 (0.4 – 1.0) | 0.5 (0.3 – 0.7)‡ |
|               | United States  | Reference        | Reference        | Reference        | Reference        | Reference       | Reference        |
| <b>Age</b>    |                |                  |                  |                  |                  |                 |                  |
|               | 18-24          | 1.9 (1.4 – 2.7)‡ | 1.9 (1.5 – 2.4)‡ | 3.1 (2.5 – 3.8)‡ | 2.4 (1.8 – 3.0)‡ | 1.1 (0.8 – 1.4) | 1.3 (1.0 – 1.5)  |
|               | 25-34          | 2.3 (1.7 – 3.0)‡ | 2.2 (1.8 – 2.8)‡ | 3.0 (2.4 – 3.6)‡ | 2.0 (1.6 – 2.5)‡ | 1.3 (1.0 – 1.6) | 1.2 (1.0 – 1.5)  |
|               | 35-49          | 2.2 (1.7 – 2.7)‡ | 2.3 (1.9 – 2.8)‡ | 2.6 (2.2 – 3.1)‡ | 1.9 (1.6 – 2.3)‡ | 1.2 (1.0 – 1.4) | 1.2 (1.1 – 1.5)‡ |
|               | 50-64          | 1.6 (1.2 – 2.0)‡ | 1.9 (1.6 – 2.3)‡ | 1.8 (1.6 – 2.1)‡ | 1.5 (1.3 – 1.8)‡ | 1.2 (1.0 – 1.4) | 1.0 (0.9 – 1.2)  |
|               | 65+            | Reference        | Reference        | Reference        | Reference        | Reference       | Reference        |
| <b>Gender</b> |                |                  |                  |                  |                  |                 |                  |

|                                                    |                   |                  |                  |                  |                  |                  |
|----------------------------------------------------|-------------------|------------------|------------------|------------------|------------------|------------------|
| Male                                               | 1.0 (0.8 – 1.1)   | 0.8 (0.7 – 0.9)‡ | 0.9 (0.8 – 0.9)‡ | 1.2 (1.1 – 1.4)‡ | 0.9 (0.8 – 1.1)  | 0.9 (0.8 – 0.9)‡ |
| Female                                             | Reference         | Reference        | Reference        | Reference        | Reference        | Reference        |
| <b>Household income</b>                            |                   |                  |                  |                  |                  |                  |
| Below average                                      | 1.5 (1.2 – 1.9)‡  | 1.3 (1.1 – 1.5)‡ | 1.1 (1.0 – 1.2)  | 1.3 (1.1 – 1.5)‡ | 1.1 (0.9 – 1.3)  | 0.9 (0.8 – 1.0)  |
| Average                                            | 1.2 (0.9 – 1.5)   | 1.3 (1.1 – 1.5)‡ | 0.9 (0.8 – 1.1)  | 1.0 (0.8 – 1.2)  | 0.9 (0.7 – 1.1)  | 0.7 (0.6 – 0.8)‡ |
| Above average                                      | Reference         | Reference        | Reference        | Reference        | Reference        | Reference        |
| <b>Number of doctors<br/>seen in the last year</b> |                   |                  |                  |                  |                  |                  |
| No doctor                                          | Reference         | Reference        | Reference        | Reference        | Reference        | Reference        |
| 1 doctor                                           | 1.0 (0.7 – 1.5)   | 0.9 (0.7 – 1.1)  | 1.0 (0.8 – 1.2)  | 1.0 (0.8 – 1.2)  | 0.9 (0.7 – 1.2)  | 1.0 (0.8 – 1.3)  |
| 2 to 3 doctors                                     | 3.0 (2.1 – 4.3)‡  | 1.5 (1.2 – 1.8)‡ | 2.0 (1.7 – 2.4)‡ | 1.8 (1.5 – 2.3)‡ | 2.7 (2.1 – 3.4)‡ | 2.6 (2.1 – 3.3)‡ |
| 4 or more doctors                                  | 7.4 (5.1 – 10.7)‡ | 2.3 (1.8 – 2.9)‡ | 3.6 (3.0 – 4.4)‡ | 3.2 (2.5 – 4.1)‡ | 3.8 (2.9 – 5.0)‡ | 4.1 (3.2 – 5.1)‡ |

|                                     |                              |                  |                  |                  |                  |                  |                  |
|-------------------------------------|------------------------------|------------------|------------------|------------------|------------------|------------------|------------------|
| <b>Health status</b>                |                              |                  |                  |                  |                  |                  |                  |
|                                     | Fair or poor                 | 1.8 (1.5 – 2.2)‡ | 1.6 (1.4 – 1.8)‡ | 1.7 (1.5 – 1.9)‡ | 1.4 (1.2 – 1.6)‡ | 1.6 (1.4 – 1.8)‡ | 1.4 (1.2 – 1.6)‡ |
|                                     | Good, very good or excellent | Reference        | Reference        | Reference        | Reference        | Reference        | Reference        |
| <b>Number of medications</b>        |                              |                  |                  |                  |                  |                  |                  |
|                                     | No medicine                  | Reference        | Reference        | Reference        | Reference        | Reference        | Reference        |
|                                     | 1 to 4 medicines             | 1.2 (1.0 – 1.4)  | 1.2 (1.0 – 1.3)  | 1.1 (1.0 – 1.3)‡ | 1.0 (0.9 – 1.2)  | 1.1 (1.0 – 1.3)  | 1.3 (1.1 – 1.5)‡ |
|                                     | 5 or more medicines          | 1.2 (0.9 – 1.6)  | 1.1 (0.9 – 1.4)  | 1.1 (0.9 – 1.3)  | 1.0 (0.8 – 1.3)  | 1.3 (1.1 – 1.6)‡ | 1.4 (1.1 – 1.7)‡ |
| <b>Number of chronic conditions</b> |                              |                  |                  |                  |                  |                  |                  |
|                                     | No chronic                   | Reference        | Reference        | Reference        | Reference        | Reference        | Reference        |

|                                                   |                  |                  |                  |                  |                  |                  |  |
|---------------------------------------------------|------------------|------------------|------------------|------------------|------------------|------------------|--|
| conditions                                        |                  |                  |                  |                  |                  |                  |  |
| 1 chronic condition                               | 1.4 (1.1 – 1.7)‡ | 1.2 (1.1 – 1.4)‡ | 1.4 (1.2 – 1.6)‡ | 1.3 (1.1 – 1.5)‡ | 1.2 (1.1 – 1.5)‡ | 1.2 (1.1 – 1.4)‡ |  |
| 2 to 4 chronic conditions                         | 2.1 (1.7 – 2.7)‡ | 1.6 (1.4 – 1.9)‡ | 1.9 (1.6 – 2.2)‡ | 1.9 (1.6 – 2.2)‡ | 1.3 (1.1 – 1.6)‡ | 1.4 (1.2 – 1.7)‡ |  |
| 5 or more chronic conditions                      | 2.1 (1.4 – 3.2)‡ | 2.5 (1.8 – 3.4)‡ | 1.8 (1.3 – 2.4)‡ | 3.0 (2.2 – 4.3)‡ | 1.6 (1.1 – 2.2)‡ | 1.7 (1.2 – 2.3)‡ |  |
| <b>Regular doctor knows your medical history</b>  |                  |                  |                  |                  |                  |                  |  |
| Often or always                                   | 0.6 (0.5 – 0.7)‡ | 0.7 (0.6 – 0.8)‡ | 0.7 (0.6 – 0.8)‡ | 0.6 (0.5 – 0.7)‡ | 0.8 (0.7 – 0.9)‡ | 0.8 (0.7 – 0.9)‡ |  |
| Never, rarely or sometimes                        | Reference        | Reference        | Reference        | Reference        | Reference        | Reference        |  |
| <b>Regular doctor spends enough time with you</b> |                  |                  |                  |                  |                  |                  |  |

|                                                        |                            |                  |                  |                  |                  |                  |                  |
|--------------------------------------------------------|----------------------------|------------------|------------------|------------------|------------------|------------------|------------------|
|                                                        | Often or always            | 0.6 (0.5 – 0.8)‡ | 0.7 (0.6 – 0.8)‡ | 0.6 (0.5 – 0.6)‡ | 0.7 (0.6 – 0.8)‡ | 0.8 (0.7 – 0.9)‡ | 0.8 (0.7 – 0.9)‡ |
|                                                        | Never, rarely or sometimes | Reference        | Reference        | Reference        | Reference        | Reference        | Reference        |
| <b>Regular doctor involves you as much as you want</b> |                            |                  |                  |                  |                  |                  |                  |
|                                                        | Often or always            | 0.6 (0.5 – 0.8)‡ | 0.8 (0.6 – 0.9)‡ | 0.7 (0.6 – 0.8)‡ | 0.8 (0.6 – 0.9)‡ | 0.9 (0.7 – 1.1)  | 0.8 (0.7 – 0.9)‡ |
|                                                        | Never, rarely or sometimes | Reference        | Reference        | Reference        | Reference        | Reference        | Reference        |
| <b>Regular doctor explains things well</b>             |                            |                  |                  |                  |                  |                  |                  |
|                                                        | Often or always            | 0.6 (0.5 – 0.7)‡ | 0.7 (0.6 – 0.9)‡ | 0.8 (0.7 – 0.9)‡ | 0.6 (0.5 – 0.7)‡ | 0.8 (0.7 – 0.9)‡ | 0.8 (0.6 – 0.9)‡ |
|                                                        | Never, rarely or sometimes | Reference        | Reference        | Reference        | Reference        | Reference        | Reference        |

\*PCP=Primary Care Physician, OR=Odds Ratio, CI=Confidence Interval

†*Poor primary care coordination* was defined as having at least three gaps from five questions.

‡ $P < 0.05$  after adjusting for multiple comparisons using Bonferroni's method
